# Supplementary material for: High affinity anti-TIM-3 and anti-KIR monoclonal antibodies cloned from healthy human individuals
Source: PLOS journal article supplement (doi:10.1371/journal.pone.0181464), 2017-07-19
Supplement: S3 (10.1371/journal.pone.0181464.s003) [file journal.pone.0181464.s003]

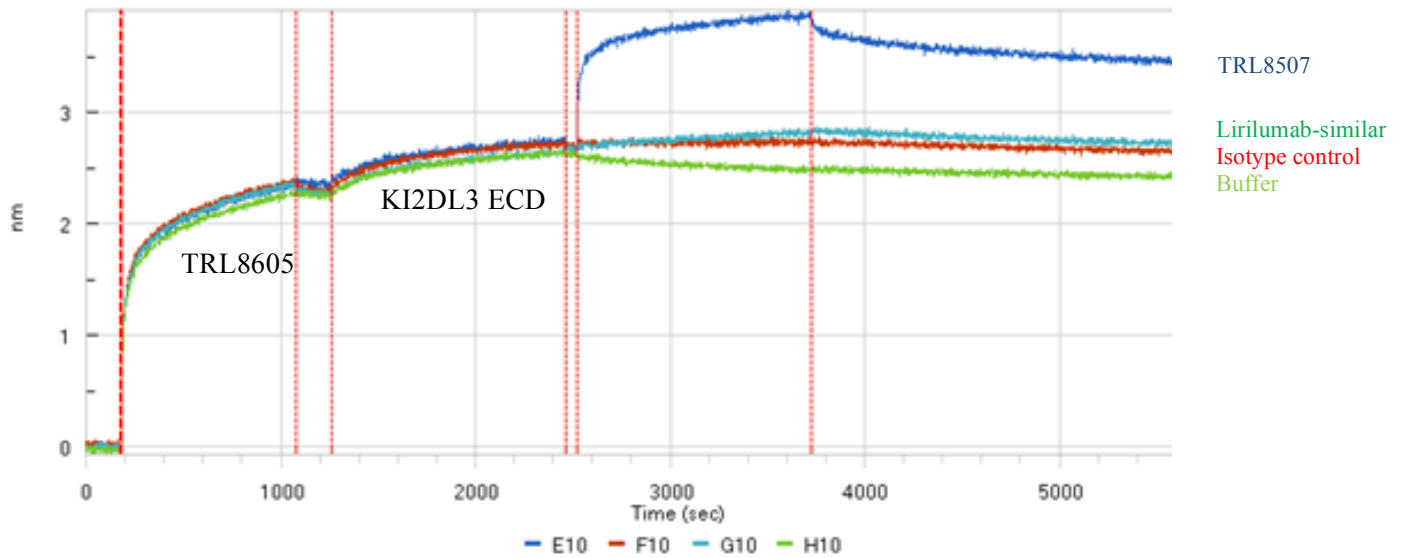

| Sensor | Load 1  | Load 2      | Load 3            |
|--------|---------|-------------|-------------------|
| A2     | TRL8605 | ECD KIR2DL3 | TRL8507           |
| B2     | TRL8605 | ECD KIR2DL3 | lirilumab-similar |
| C2     | TRL8605 | ECD KIR2DL3 | Isotype control   |
| D2     | TRL8605 | ECD KIR2DL3 | Buffer            |

**S3 Fig. Bio-Layer Interferometry (ForteBio Octet) was used to determine the competitive binding site for anti-KIR2DL3 mAbs.** TRL8605 was first bound to the anti-Fc sensors (Load 1). KIR2DL3 added was then allowed to bind to TRL8605 (Load 2) followed by TRL8507 or lirilumab-similar (Load 3).
