# Supplementary material for: High affinity anti-TIM-3 and anti-KIR monoclonal antibodies cloned from healthy human individuals
Source: PLOS journal article supplement (doi:10.1371/journal.pone.0181464), 2017-07-19
Supplement: S6 (10.1371/journal.pone.0181464.s006) [file journal.pone.0181464.s006]

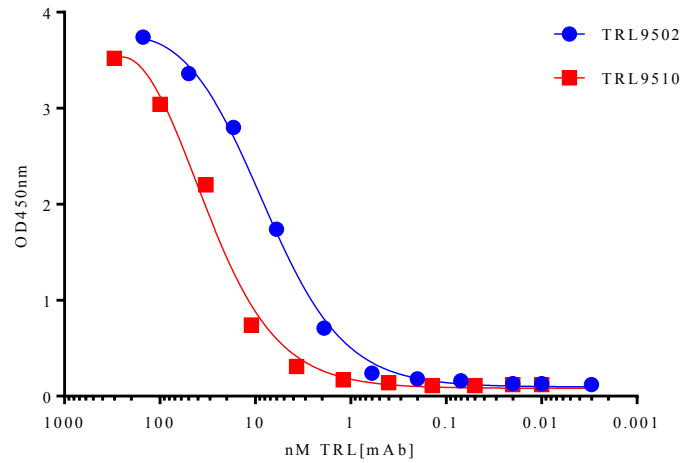

**S6 Fig. Affinity determination for anti-CEACAM1 mAbs by ELISA.** ELISA binding curves were generated using the ECD of CEACAM1 amino terminal domain at 2  $\mu\text{g}/\text{mL}$  and serial dilutions of the anti- CEACAM1 mAbs. Midpoint of the binding curve was used to estimate the affinity ( $K_d$ ) using the Prizm software. The calculated  $K_d$  were the following: TRL9502=8 nM and TRL9510=50 nM.
